# Supplementary material for: CD301b+ Macrophages as Potential Target to Improve Orthodontic Treatment under Mild Inflammation
Source: MDPI journal article supplement (doi:10.3390/cells12010135), 2022-12-29
Supplement: s1 [file s1]

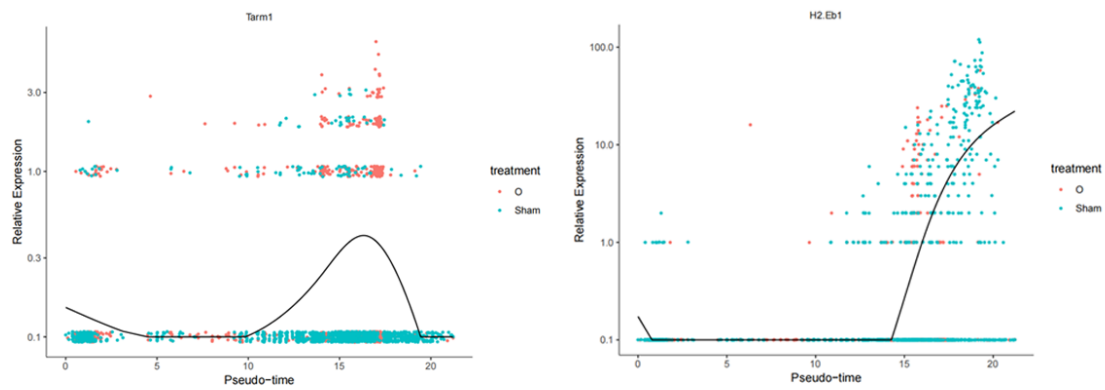

**Figure S1:** Single cell trace analysis of different genes was performed using Monocle.

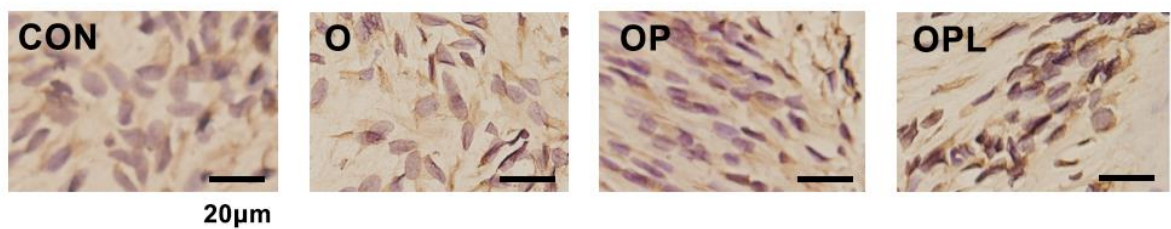

**Figure S2:** Expression of immunohistochemical inflammatory marker TNF- $\alpha$  (scale bar = 20  $\mu$  m) .

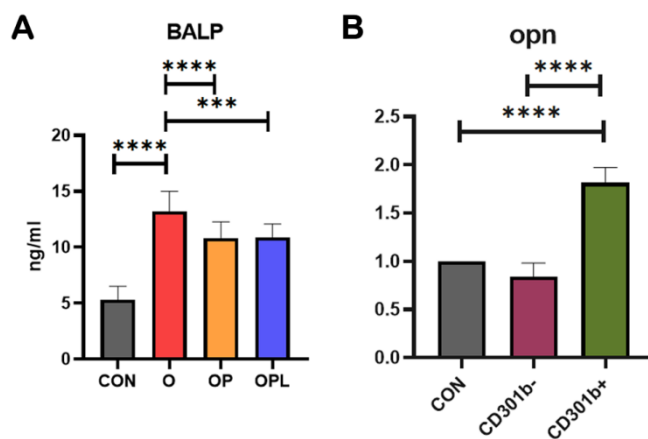

**Figure S3:** (A)Expression of bone metabolic marker BALP. (B)Expression of osteogenesis-related gene OPN in BMSC under stretching force after osteogenesis induction was detected using qRT-PCR.

Values are presented as mean  $\pm$  SD. \*\*\*P < 0.001, \*\*\*\*P < 0.000 1. n=3-6.

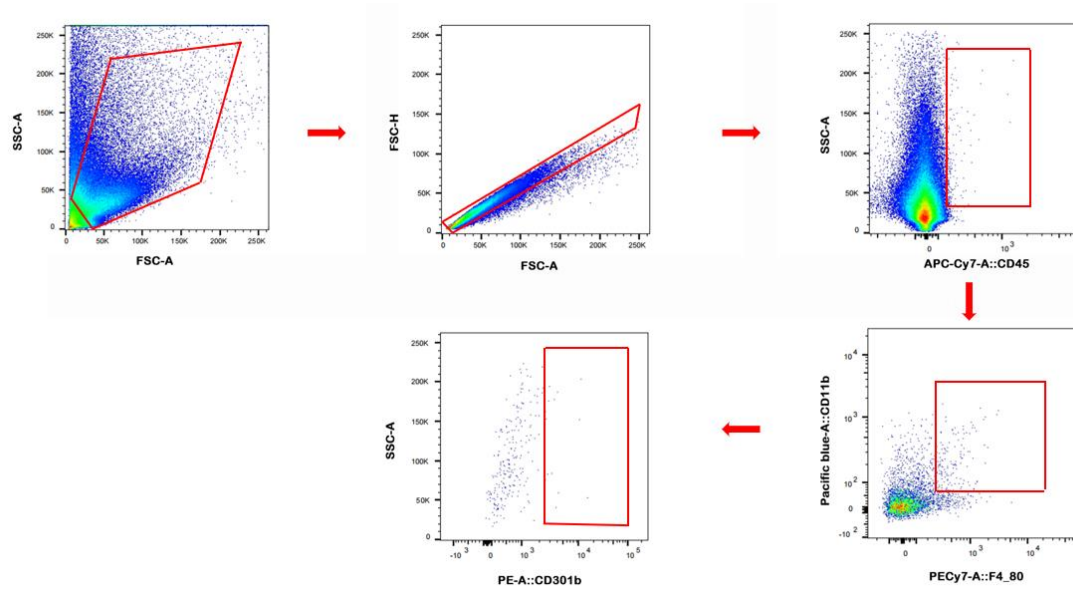

**Figure S4:** Gating strategy of CD301b+ macrophages.

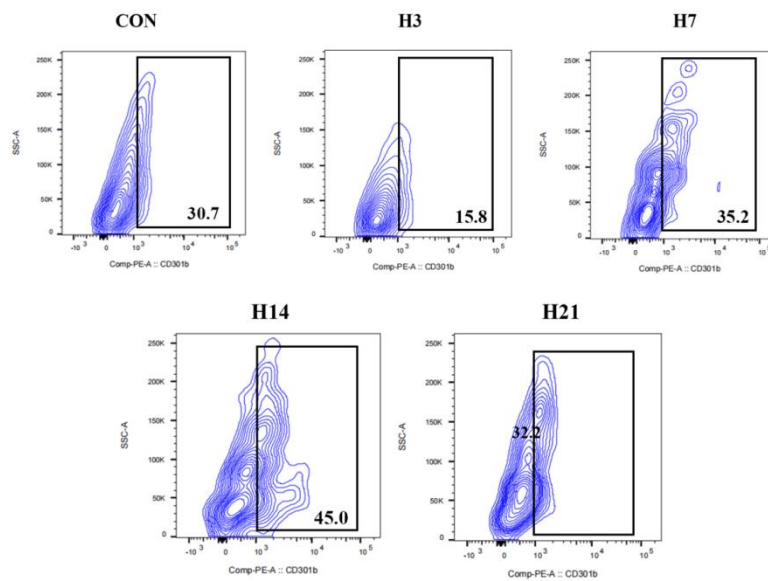

**Figure S5:** Flow cytometry plots of CD301b+ macrophage content around orthodontically mobile teeth in orthodontic models after 3, 7, 14, and 21 days of periodontitis unlining in control and periodontal models.
